# Supplementary material for: Influence of the Second-Phase Resin Structure on the Interfacial Shear Strength of Carbon Fiber/Epoxy Resin
Source: MDPI journal article supplement (doi:10.3390/ma17061323), 2024-03-13
Supplement: s1 [file s1]

# Influence of the Second-Phase Resin Structure on the Interfacial Shear Strength of Carbon Fiber/Epoxy Resin

## Supplementary Materials

Hansong Liu <sup>1</sup>, Jinsong Sun <sup>1</sup>, Lianwang Zhang <sup>1</sup>, Zhaobo Liu <sup>2</sup>, Chengyu Huang <sup>2</sup>, Mingchen Sun <sup>2</sup>, Ziqi Duan <sup>3</sup>, Wenge Wang <sup>3</sup>, Xiangyu Zhong <sup>1,\*</sup> and Jianwen Bao <sup>1,3,\*</sup>

<sup>1</sup> AVIC Manufacturing Technology Institute Composite Technology Center, Beijing, China; liuhansongzhfc@foxmail.com (H.L.); sunjsbuaa@163.com (J.S.); zhanglian51@163.com (L.Z.)

<sup>2</sup> School of Materials Science and Engineering, Beihang University, Beijing, China; lzbuaa@163.com (Z.L.); huangchengyu@buaa.edu.cn (C.H.); smc703@126.com (M.S.)

<sup>3</sup> AVIC Composite Corporation Ltd., Beijing, China; dzq970920@163.com (Z.D.); 15966308692@163.com (W.W.)

\* Correspondence: xyzhong2003@sohu.com (X.Z.); baojianwen@sohu.com (J.B.)

Table S1. Properties of CF800.

| Fiber Type | Filament Count | Tensile Strength/MPa | Tensile Modulus/GPa | Strain at Failure/% | Weight/Length /g·km <sup>-1</sup> |
|------------|----------------|----------------------|---------------------|---------------------|-----------------------------------|
| CF800      | 12K            | 5641                 | 295                 | 1.93                | 447                               |

Table S2. Properties of AC53X.

| Resin Type | Structure-Epoxy resin | Epoxy value /mol·100g <sup>-1</sup> | Structure-Curing agent | Amine value /mgKOH·g <sup>-1</sup> | Resin/ curing agent mass ratio | Content of RS2000/% |
|------------|-----------------------|-------------------------------------|------------------------|------------------------------------|--------------------------------|---------------------|
| AC53X-1    | Figure S1             | 0.80~0.87                           | Figure S2              | 62.1                               | 100:52                         | 12.5                |
| AC53X-2    | Figure S1             | 0.80~0.87                           | Figure S2              | 62.1                               | 100:52                         | 0                   |

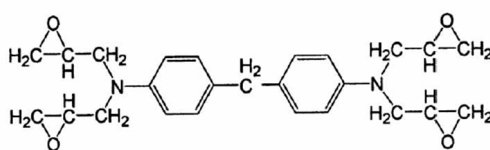

Figure S1. Structure of epoxy resin of AC53X.

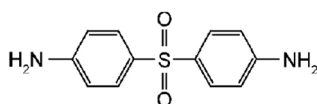

Figure S2. Structure of curing agent of AC53X.
